# Supplementary material for: Screening of efficient polymers for siRNA delivery in a library of hydrophobically modified polyethyleneimines
Source: Royal Society of Chemistry journal article supplement (doi:10.1039/c6tb01929c), 2016-01-01
Supplement: c6tb01929c1.pdf [file c6tb01929c1.pdf]

Supporting information

**Screening of efficient polymers for siRNA delivery in a library of  
hydrophobically modified polyethyleneimines**

Wanwan Shen<sup>†</sup>, Hui Wang<sup>†</sup>, Ye Ling-Hu, Jia Lv, Hong Chang, Yiyun Cheng\*

*Shanghai Key Laboratory of Regulatory Biology, School of Life Sciences, East China Normal University, Shanghai, 200241, P. R. China*

**Table S1.** Feeding ratios of the ligand and bPEI during synthesis and characterizations of the synthesized materials.

| Ligand | Chemical Structure                                                                  | Feeding molar ratio <sup>[a]</sup> | n <sup>[b]</sup> | Polymer |
|--------|-------------------------------------------------------------------------------------|------------------------------------|------------------|---------|
| 1      | 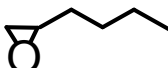   | 36                                 | 30               | 1-1     |
|        |                                                                                     | 72                                 | 49               | 1-2     |
|        |                                                                                     | 108                                | 77               | 1-3     |
|        |                                                                                     | 143                                | 99               | 1-4     |
| 2      |  | 72                                 | 24               | 2-1     |
|        |                                                                                     | 143                                | 48               | 2-2     |
|        |                                                                                     | 172                                | 77               | 2-3     |
|        |                                                                                     | 286                                | 95               | 2-4     |
| 3      |  | 36                                 | 29               | 3-1     |
|        |                                                                                     | 72                                 | 54               | 3-2     |
|        |                                                                                     | 86                                 | 76               | 3-3     |
|        |                                                                                     | 108                                | 103              | 3-4     |
| 4      |  | 36                                 | 29               | 4-1     |
|        |                                                                                     | 72                                 | 50               | 4-2     |
|        |                                                                                     | 143                                | 73               | 4-3     |
|        |                                                                                     | 172                                | 100              | 4-4     |
| 5      |  | 36                                 | 30               | 5-1     |
|        |                                                                                     | 72                                 | 56               | 5-2     |
|        |                                                                                     | 100                                | 70               | 5-3     |
|        |                                                                                     | 125                                | 104              | 5-4     |
| 6      |  | 36                                 | 25               | 6-1     |
|        |                                                                                     | 72                                 | 57               | 6-2     |
|        |                                                                                     | 100                                | 79               | 6-3     |
|        |                                                                                     | 125                                | 108              | 6-4     |
| 7      |  | 25                                 | 23               | 7-1     |
|        |                                                                                     | 50                                 | 42               | 7-2     |
|        |                                                                                     | 75                                 | 73               | 7-3     |
|        |                                                                                     | 100                                | 100              | 7-4     |

|    |                                                                                    |     |     |      |
|----|------------------------------------------------------------------------------------|-----|-----|------|
| 8  | 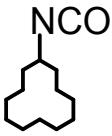  | 25  | 23  | 8-1  |
|    |                                                                                    | 50  | 49  | 8-2  |
|    |                                                                                    | 75  | 75  | 8-3  |
|    |                                                                                    | 100 | 100 | 8-4  |
| 9  |   | 72  | 27  | 9-1  |
|    |                                                                                    | 108 | 52  | 9-2  |
|    |                                                                                    | 143 | 68  | 9-3  |
|    |                                                                                    | 215 | 98  | 9-4  |
| 10 |   | 36  | 28  | 10-1 |
|    |                                                                                    | 72  | 54  | 10-2 |
|    |                                                                                    | 108 | 76  | 10-3 |
|    |                                                                                    | 143 | 102 | 10-4 |
| 11 |   | 25  | 21  | 11-1 |
|    |                                                                                    | 50  | 46  | 11-2 |
|    |                                                                                    | 72  | 71  | 11-3 |
|    |                                                                                    | 108 | 105 | 11-4 |
| 12 |  | 36  | 30  | 12-1 |
|    |                                                                                    | 72  | 51  | 12-2 |
|    |                                                                                    | 108 | 76  | 12-3 |
|    |                                                                                    | 143 | 112 | 12-4 |

[a] Feeding ratio is the molar ratio of the hydrophobic ligands to bPEI during synthesis.

[b] n is the average number of modified ligands on each bPEI calculated by  $^1\text{H}$  NMR or elemental analysis.

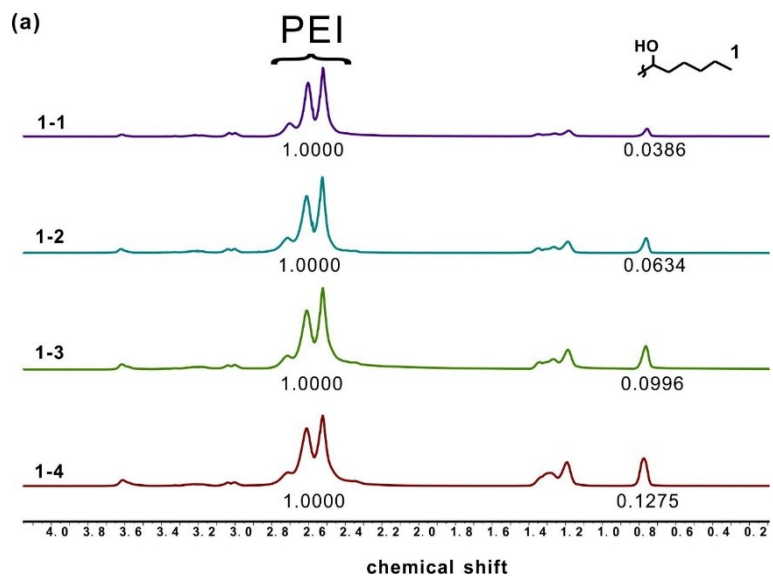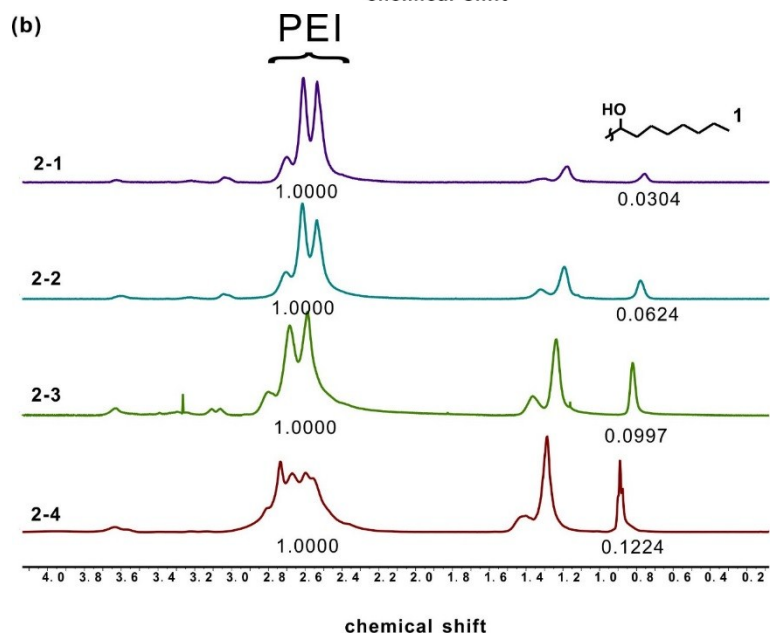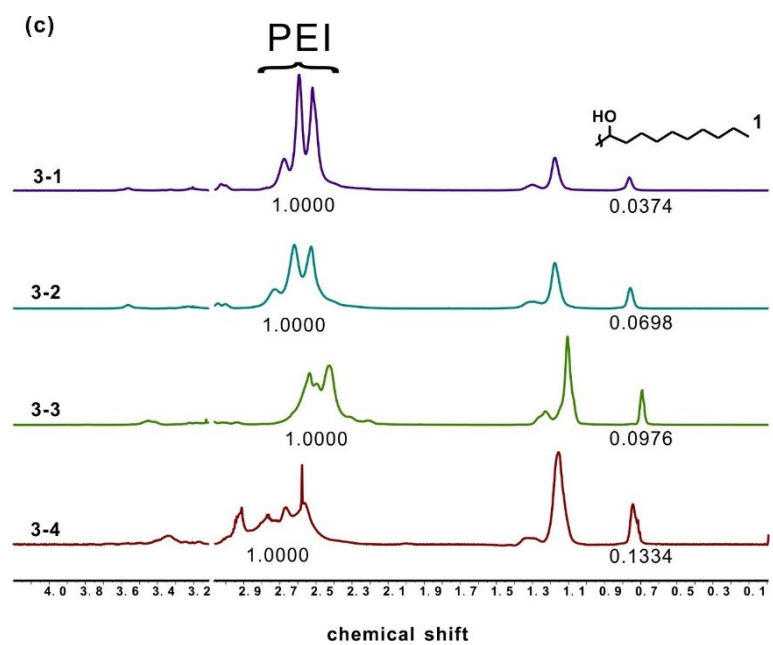

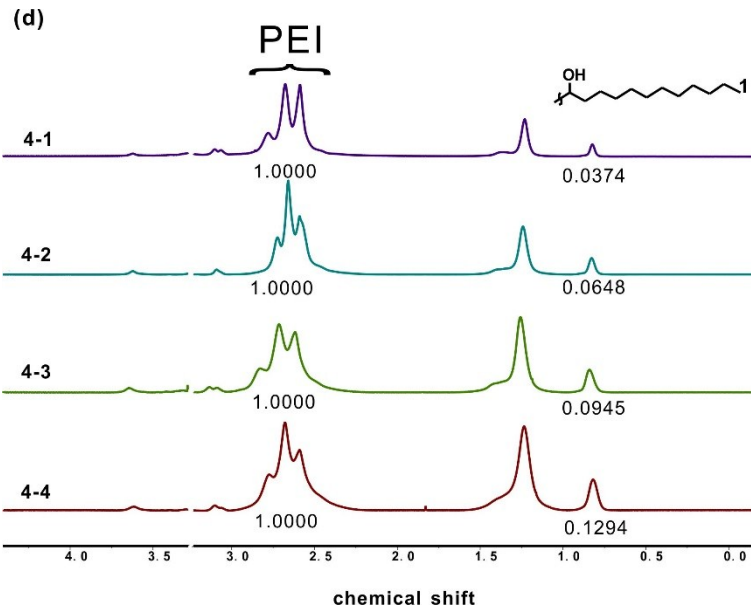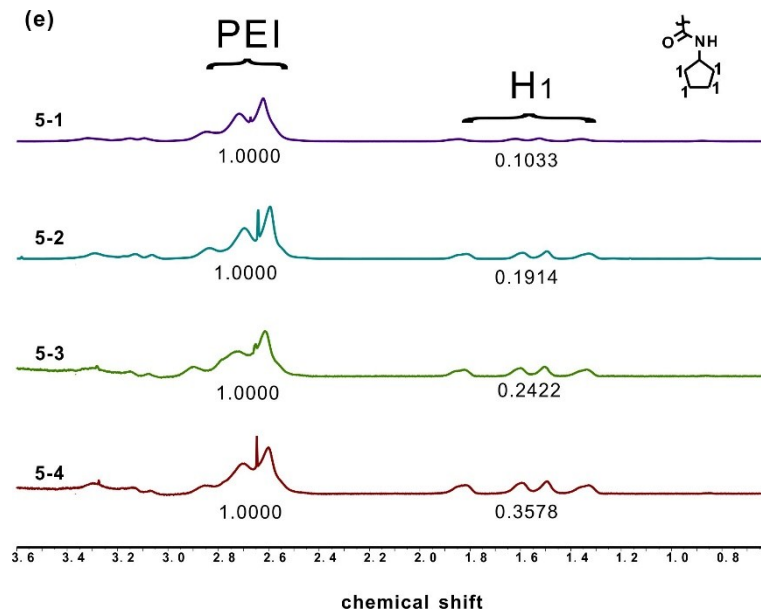

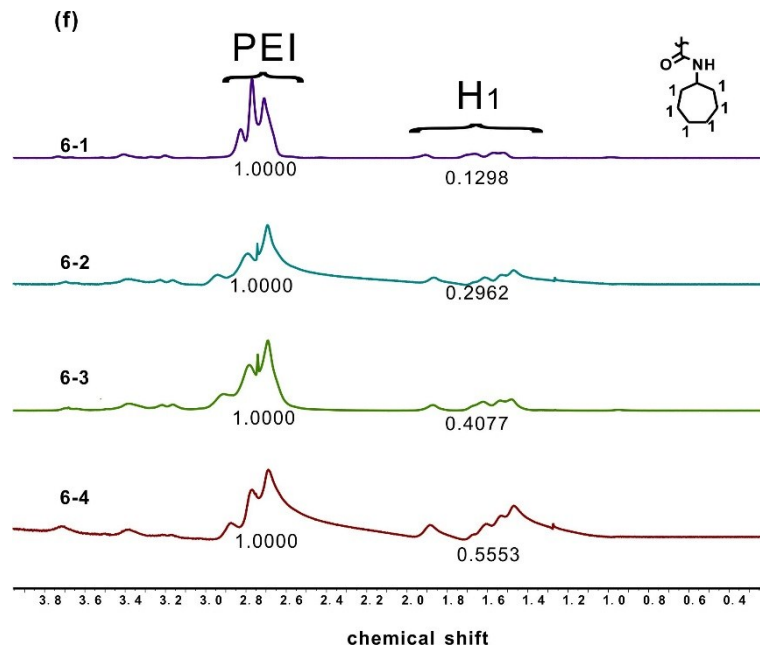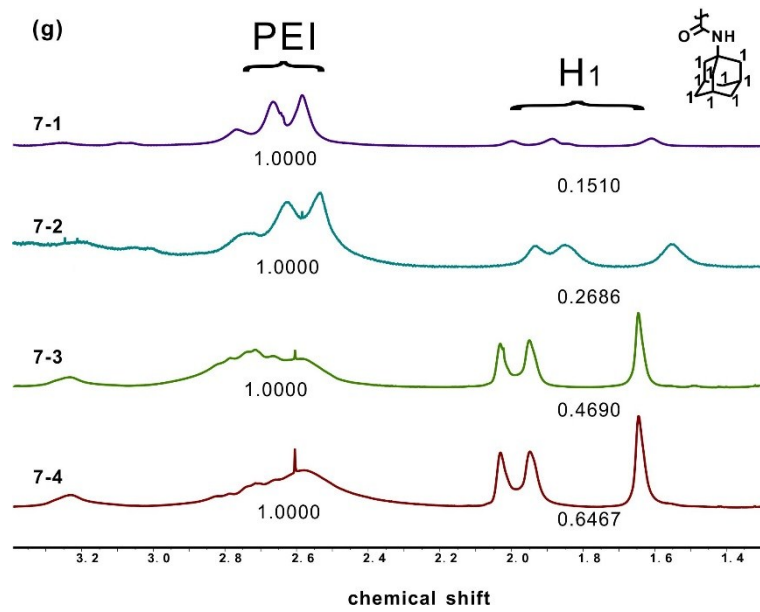

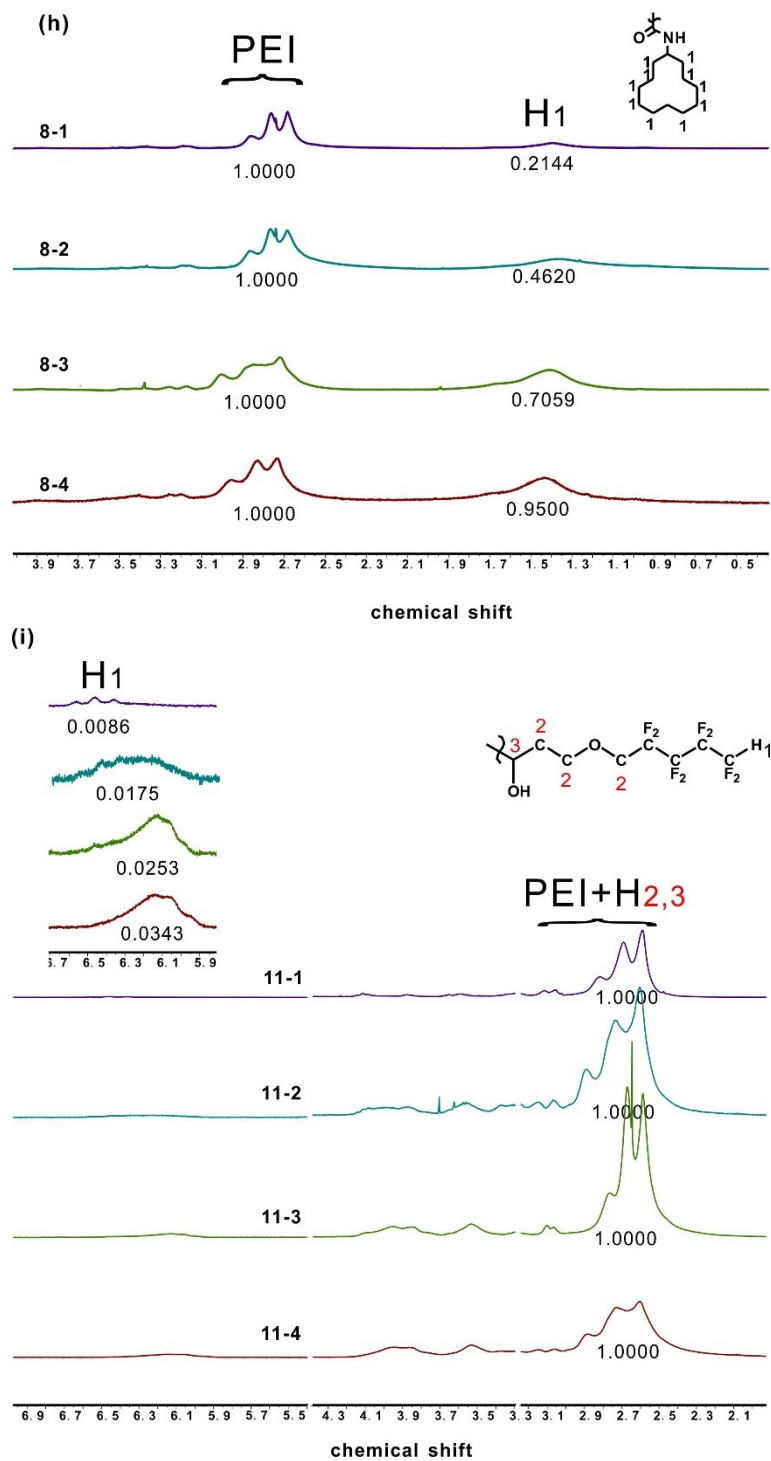

**Fig. S1**  $^1\text{H-NMR}$  spectra of the synthesized materials in  $\text{D}_2\text{O}$  (a - i).

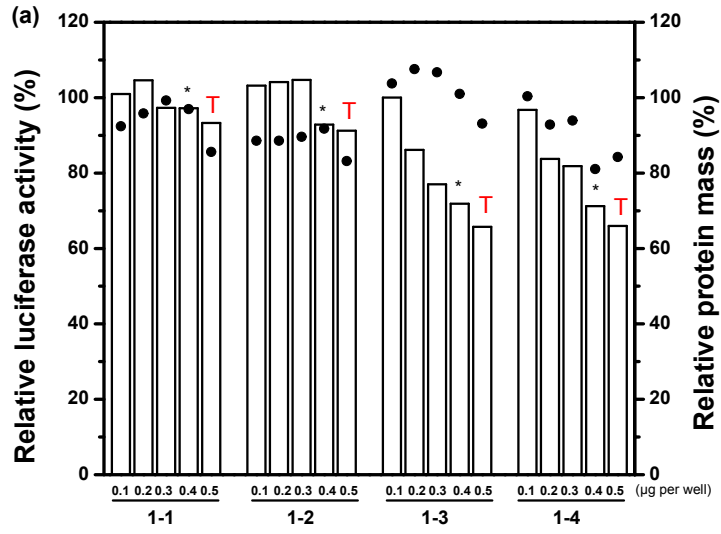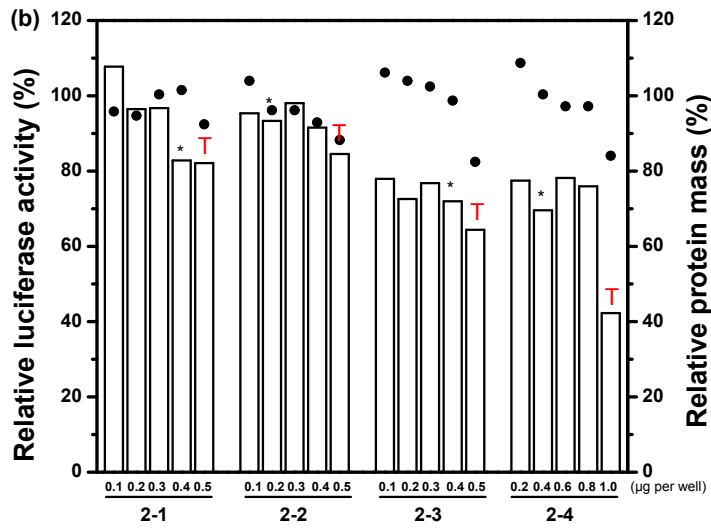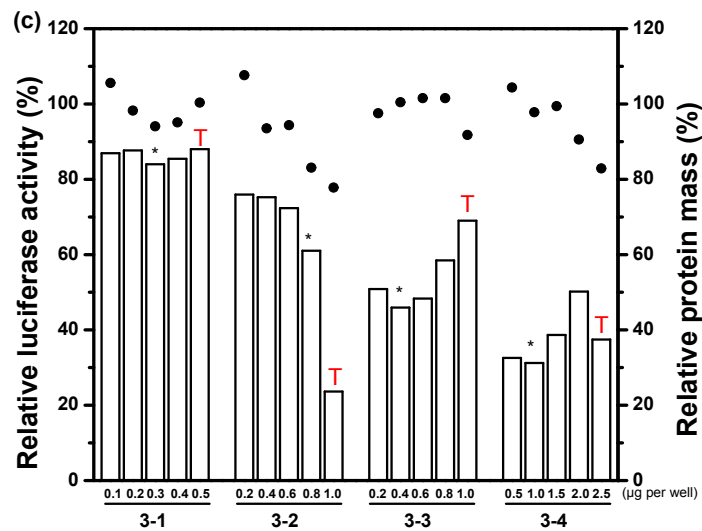

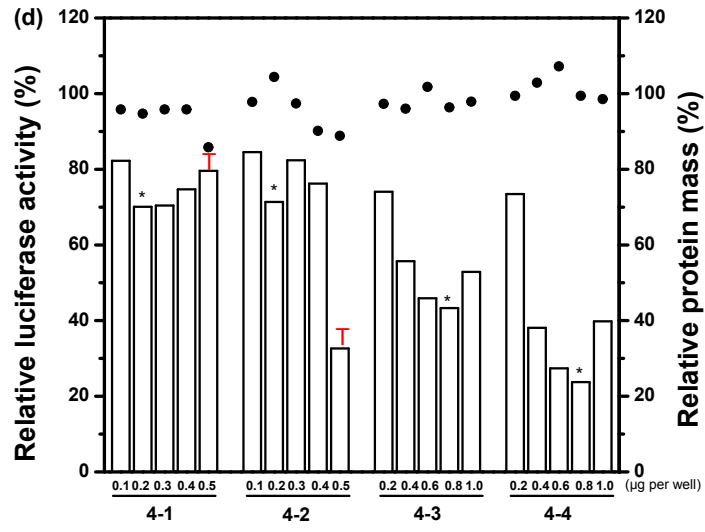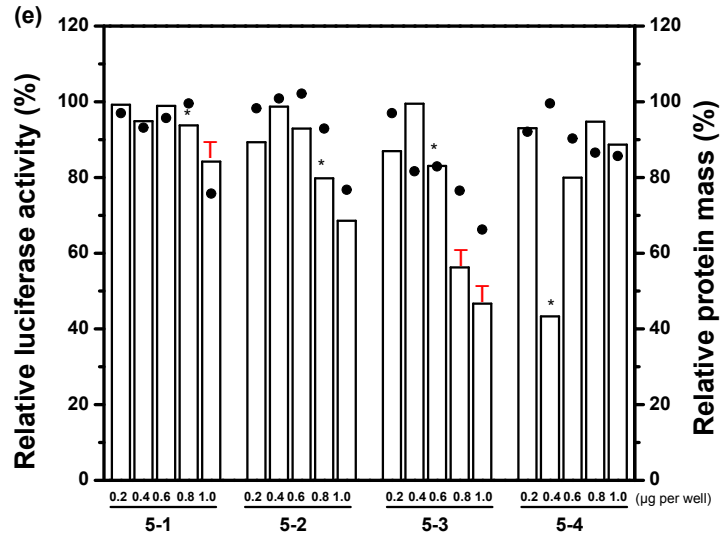



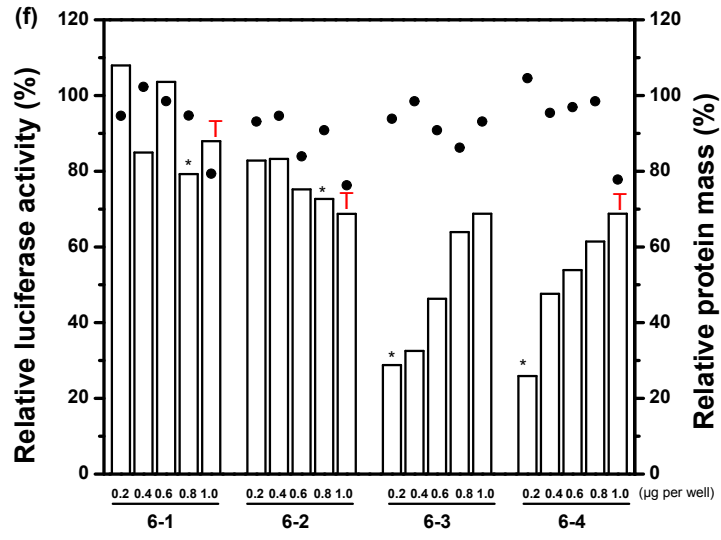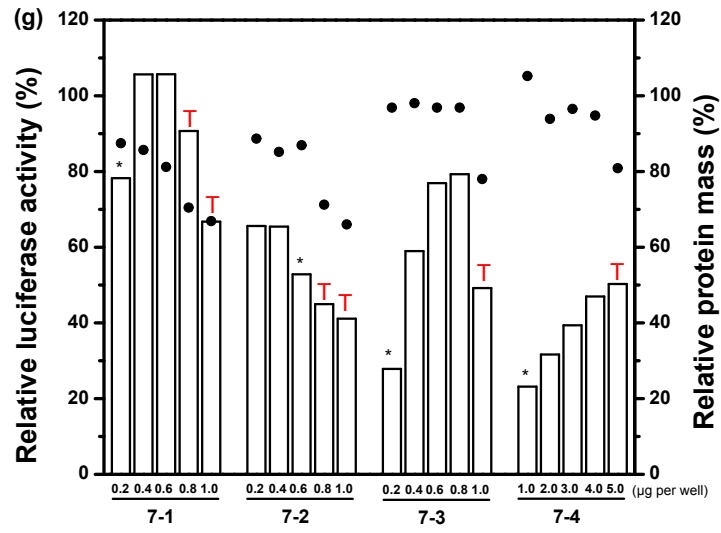

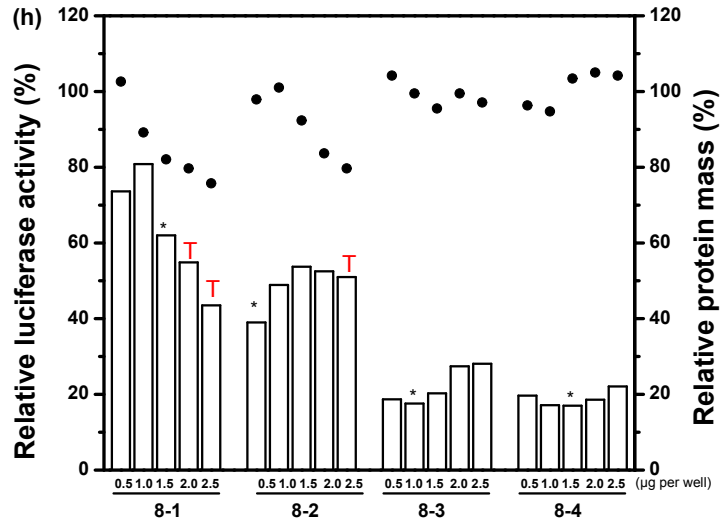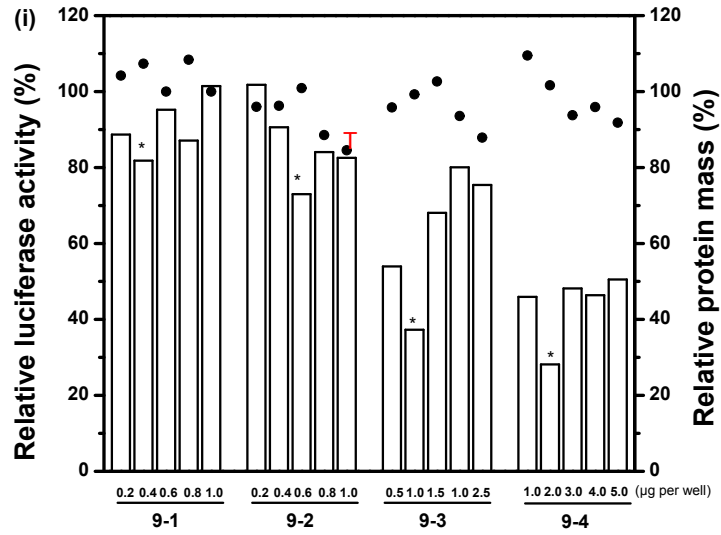

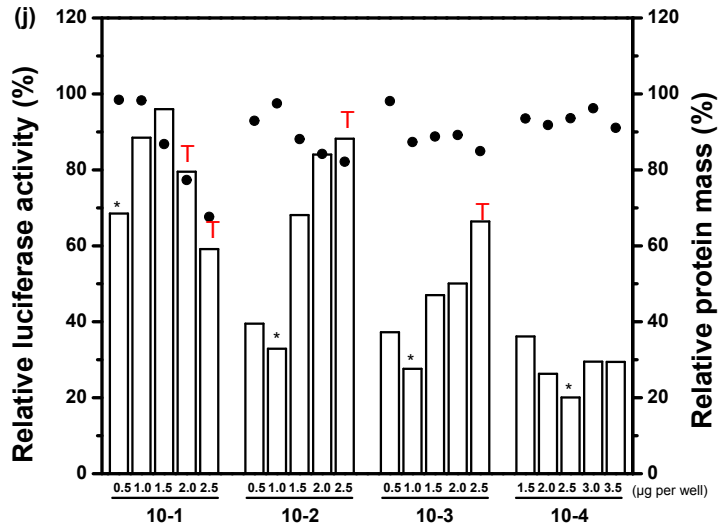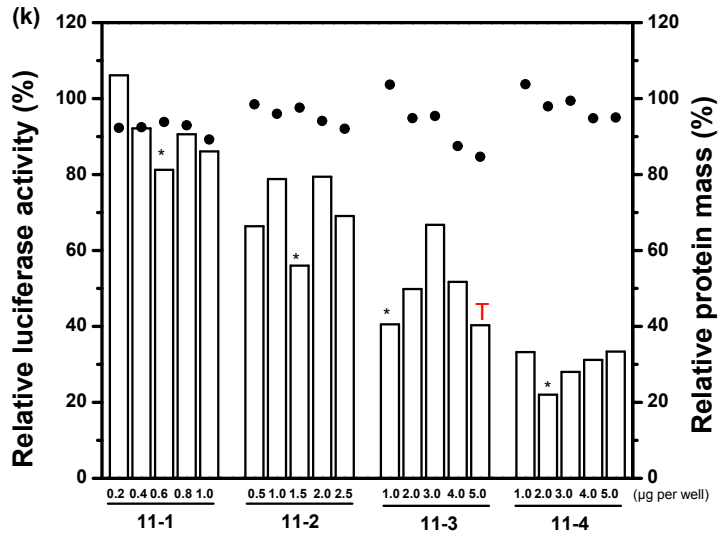

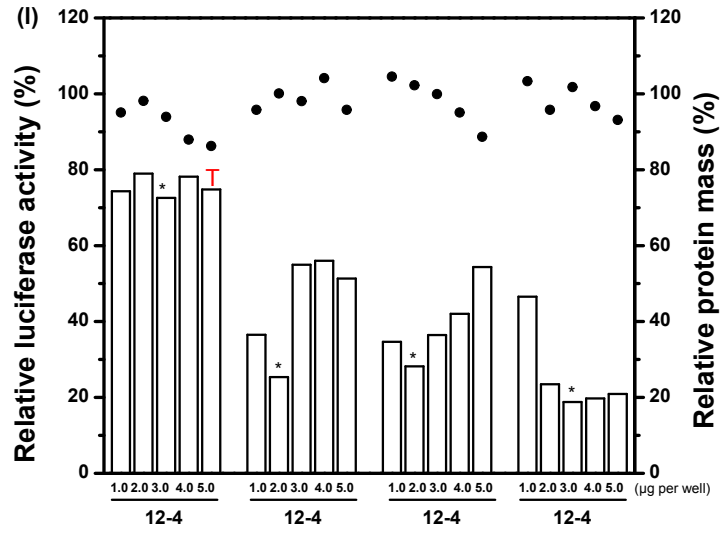

**Fig. S2** Gene silencing efficacies of modified PEIs on HeLa-Luc cells for 24 h (a-l). The siRNA dose was 10 nM (0.133 µg/mL). “\*” Represents the optimal weight for each material in gene silencing. “T” indicates toxicity on the transfected cells.

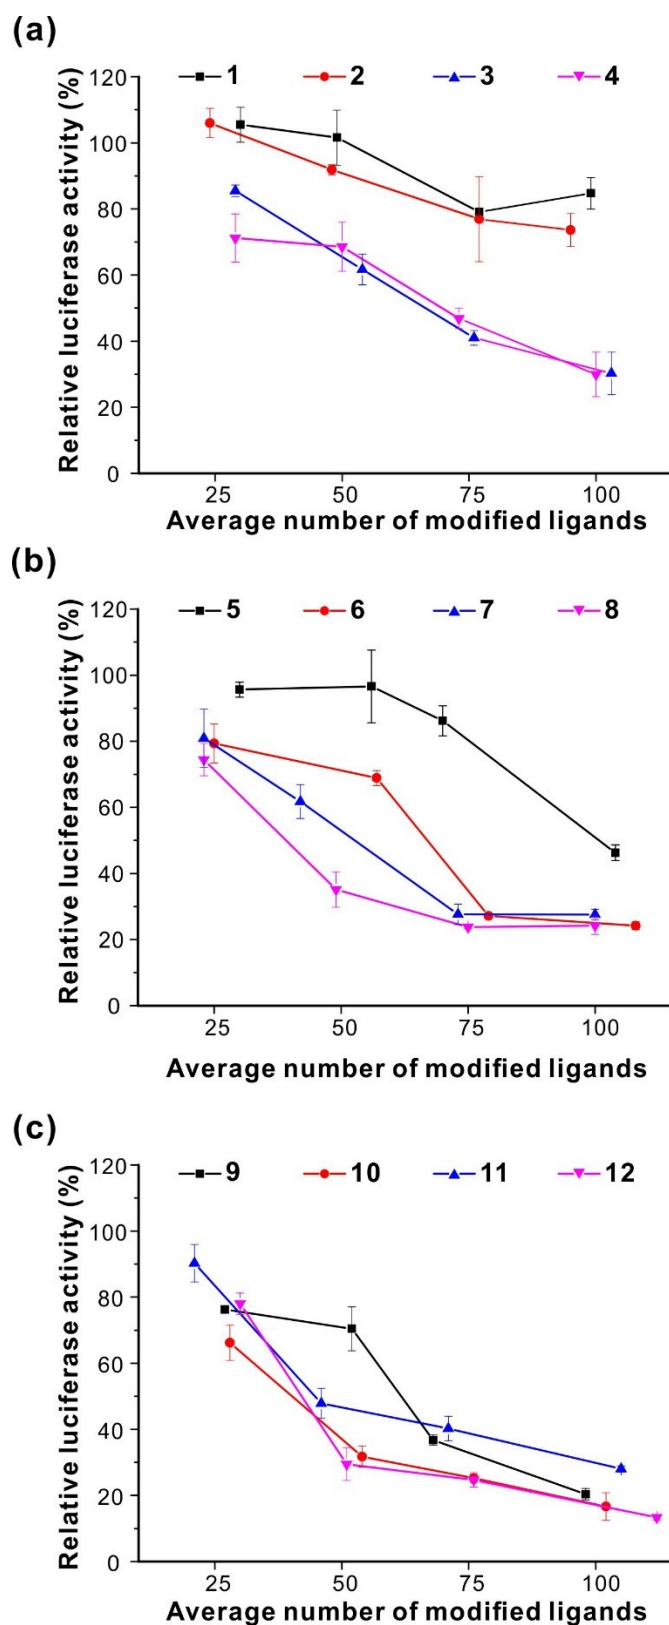

**Fig. S3** Gene silencing efficacies of alkane- (a), cycloalkane- (b) and fluoroalkane- (c) modified bPEI on HeLa-Luc cells. The optimal transfection condition for each material was chosen according to the screening results in Fig. S2. The siRNA dose was 10 nM (0.133  $\mu\text{g/mL}$ ).

(a)

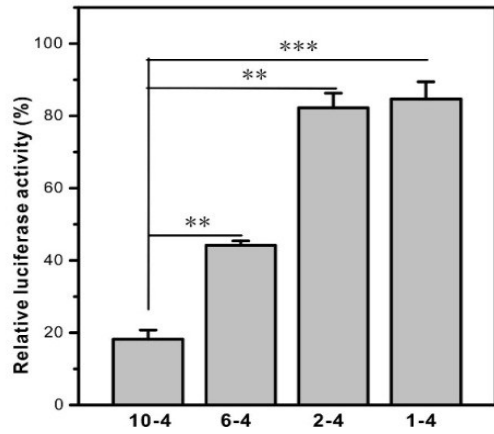

(b)

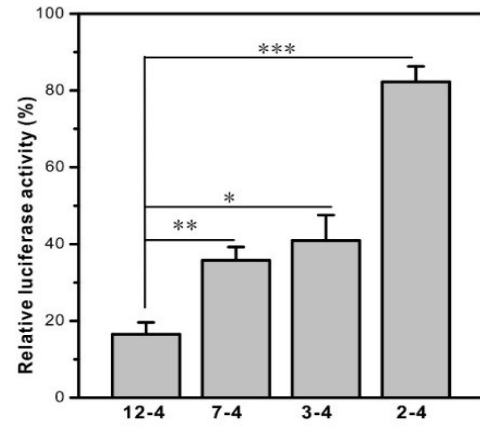

**Fig. S4** Gene silencing efficacies of 10-4 (a) and 12-4(b) with their aliphatic analogues in MDA-MB231-Luc cells. The siRNA dose was 10 nM (0.133  $\mu\text{g}/\text{mL}$ ). \* $p < 0.05$ , \*\* $p < 0.01$ , and \*\*\* $p < 0.001$  analyzed by Student's t-test.

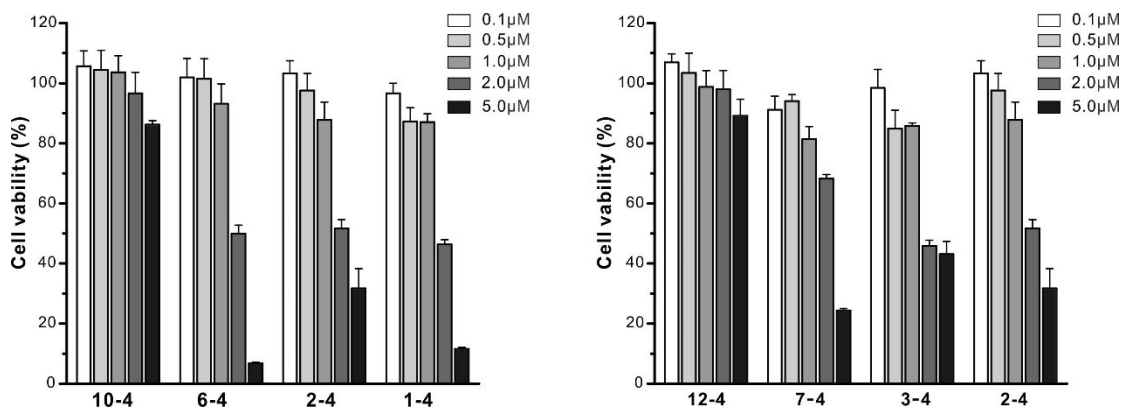

**Fig. S5** Comparison of the cell viabilities of 10-4 and 12-4 with their respective alkylated and cycloalkylated analogues in HeLa-Luc cells.
